# Supplementary material for: Luteolin can ameliorate renal interstitial fibrosis-induced renal anaemia through the SIRT1/FOXO3 pathway
Source: Royal Society of Chemistry journal article supplement (doi:10.1039/d2fo02477b), 2022-01-01
Supplement: d2fo02477b1.pdf [file d2fo02477b1.pdf]

### Figure Legends

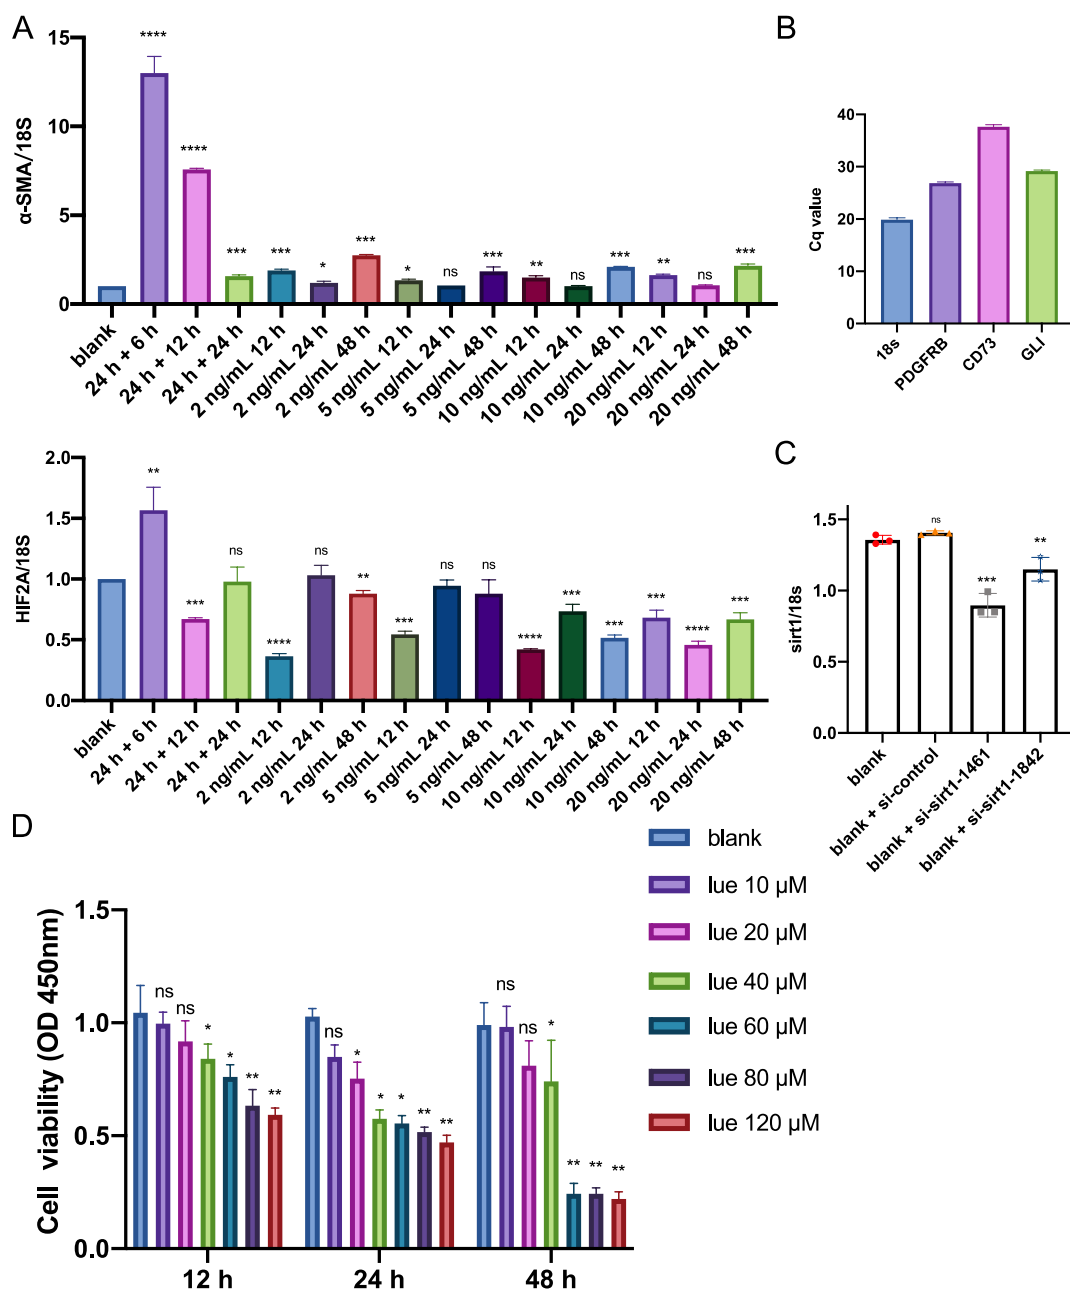

**Fig. S1** A RT-qPCR detection of  $\alpha$ -SMA and HIF2A mRNA expression in hypoxia-reoxygenation and TGF $\beta$ 1-induced NRK49F myofibrosis-induced renal anaemia model. B RT-qPCR method to identify the REPs properties of NRK-49F. C SIRT1-siRNA transfection efficiency was detected by RT-qPCR. \* represents comparison with blank group, <sup>ns</sup> represents P > 0.05. D Proliferation and toxicity of luteolin on NRK49F. The Y axis represents the OD value of cell viability at wavelength = 450 nm by the microplate reader. n = 5, represents 5 replicate wells per group, \* represents comparison with blank group, <sup>ns</sup> represents P > 0.05.

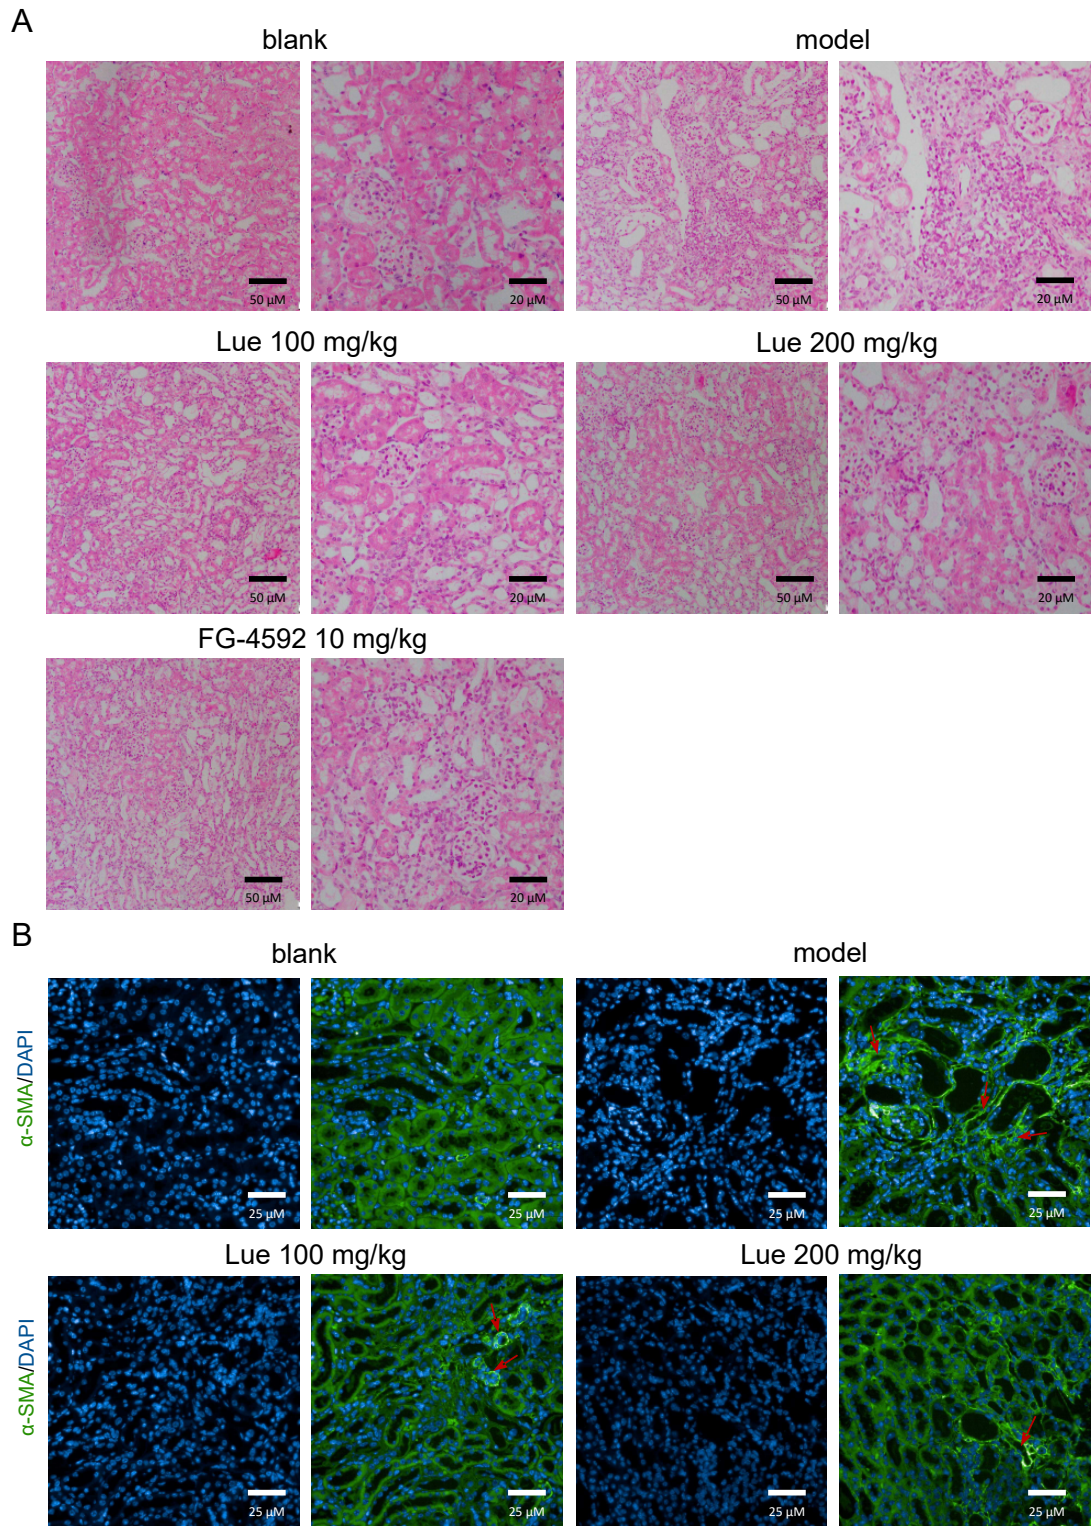

**Fig. S2** A Kidney HE staining results of each group *in vivo*, Scale bar = 50  $\mu$ M & 20  $\mu$ M. B Immunofluorescence expression of  $\alpha$ -SMA in kidney tissue of various groups of mice. Green fluorescence indicates  $\alpha$ -SMA, blue fluorescence indicates the nucleus, and red arrows represent the site of  $\alpha$ -SMA expression, Scale bar = 25  $\mu$ M.

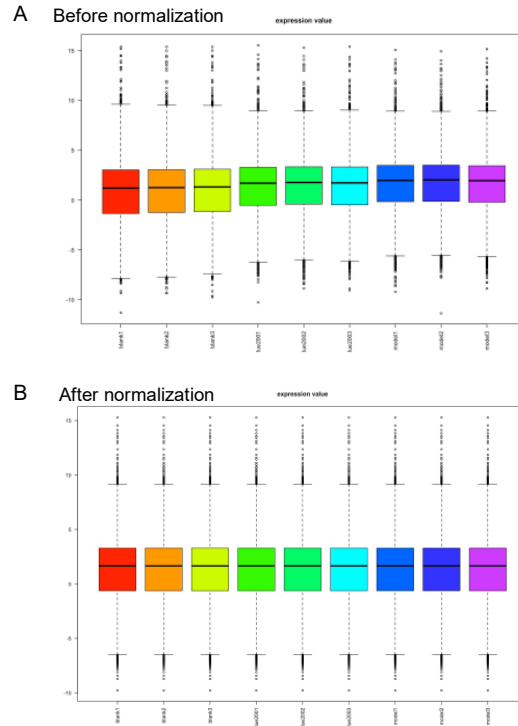

**Fig. S3** Box plots of three groups of animal samples before and after normalization of FPKM data. A Box plots of three groups of samples before normalization; B Box plots of three groups of samples after normalization.

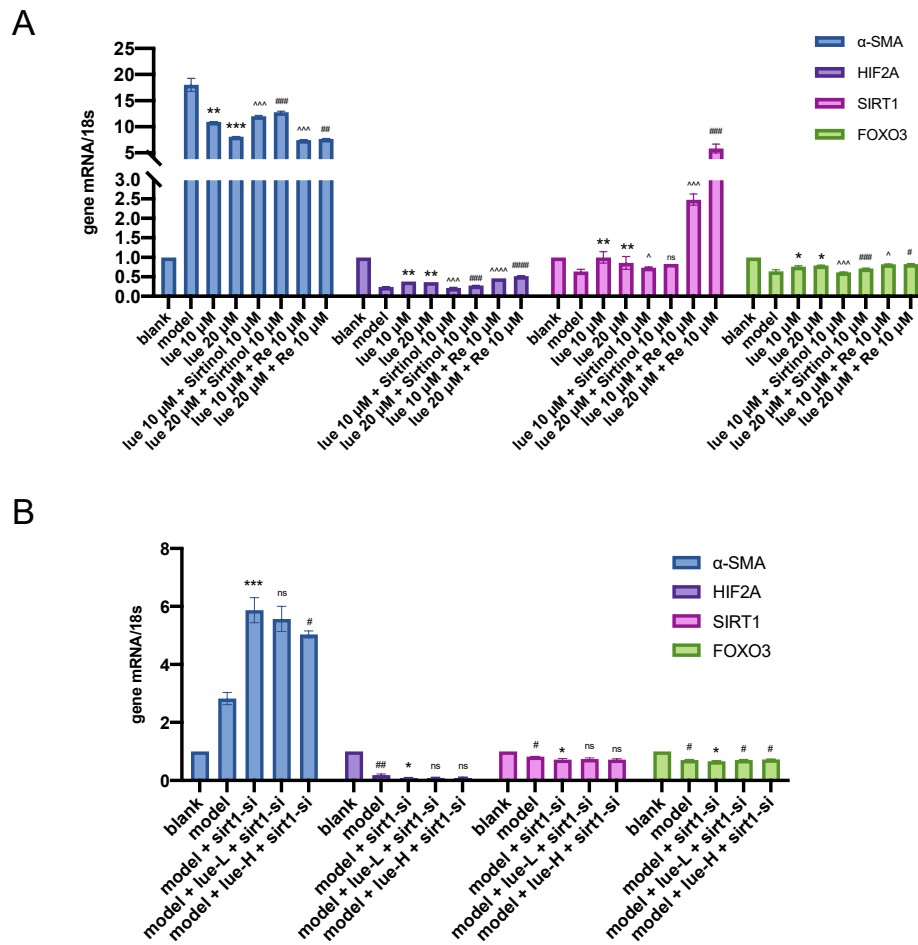

**Fig. S4** A After administration of SIRT1 activator and inhibitor,  $\alpha$ -SMA, HIF2A, SIRT1 and FOXO3 mRNA expression levels were measured by RT-qPCR in each group of cells. n = 3, \* represents comparison with model group, ^ represents comparison with Lue 10  $\mu$ M group, # represents comparison with Lue 20  $\mu$ M group, <sup>ns</sup> represents P > 0.05. B After administration of SIRT1-siRNA intervention,  $\alpha$ -SMA, HIF2A, SIRT1 and FOXO3 mRNA expression levels were measured by RT-qPCR in each group of cells. n = 3, \* represents comparison with model group, # represents comparison with model + sirt1-si group, <sup>ns</sup> represents P > 0.05.

**Table S1 RT-qPCR Primer Sequences.**

| Gene name            | Forward sequence(5'to 3') | Reverse sequence (5' to 3') | Product size (bp) |
|----------------------|---------------------------|-----------------------------|-------------------|
| 18S                  | GTAACCCGTTGAACCCATT       | CCATCCAACGGTAGTAGCG         | 150               |
| Mice EPO             | TGGGAGCTCAGAAGGAATTGA     | TCCAAGTGTGAGTGTTCGGAG       | 73                |
| Mice HIF2A           | TCCTTCGGACACATAAGCTCC     | GACAGAAAGATCATGTCACCGT      | 148               |
| Mice $\alpha$ -SMA   | CCCAGACATCAGGGAGTAATGG    | TCTATCGGATACTTCAGCGTCA      | 104               |
| Mice Collagen I      | TAAGGGTCCCAATGGTGAGA      | GGGTCCCTCGACTCCTACAT        | 203               |
| Mice Fibronectin     | ACAAGGTTCGGGAAGAGGTT      | CCGTGTAAGGGTCAAAGCAT        | 93                |
| Mice SIRT1           | ATGACGCTGTGGCAGATTGTT     | CCGCAAGGCGAGCATAGAT         | 202               |
| Mice FOXO3           | GCTAAGCAGGCCTCATCTCA      | TTCCGTCAGTTTGAGGGTCT        | 92                |
| Rat PDGFRB           | GTCAATGTCCCTGTCCGTGT      | GTGTGGGTGACAGTTTTCGC        | 157               |
| Rat CD73             | CTCTGCACCAAGTGTGAGT       | ATCCGTCCTTCAACTGCTGG        | 215               |
| Rat Gli              | TGAAGACACACCTTCGGTCCG     | TCGATGTCGTTTGGTCACGT        | 242               |
| Rat EPO              | TCACAATGGGCTGTGCAGAA      | ACCCGAAGCAGTGAAGTGAG        | 259               |
| Rat HIF2A            | GATGCCTGACAAGACCGTCA      | CCCTTTTGAGCTCCTGGAGG        | 207               |
| Rat $\alpha$ -SMA    | ACCATCGGGAATGAACGCTT      | CTGTCAGCAATGCCTGGGTA        | 191               |
| Rat Collagen I       | CCCAGCGGTGGTTATGACTT      | TCTCCGCTCTTCCAGTCAGA        | 245               |
| Rat Fibronectin      | TCCACCTGTACACGCTCAAC      | AGGGGATCCAGGCTTCTCAT        | 188               |
| Rat SIRT1            | TATGTGCCTGTGCAGTGAAG      | GCTGTTGCAAAGGAACCATGAC      | 198               |
| Rat FOXO3            | CTCCCTGCGAGTGTCTATACTTT   | TACCTCGGCTCCTTCCCTTCA       | 219               |
| Rat SIRT1-siRNA-1842 | GCAGAUUAGUAAGCGUCUUTT     | AAGACGCUUACUAAUCUGCTT       | -                 |
| Rat SIRT1-siRNA-1461 | CCCUGUAAAGCUUUCAGAATT     | UUCUGAAAGCUUUCAGGGTT        | -                 |
| control-siRNA        | UUCUCCGAACGUGUCACGUTT     | ACGUGACACGUUCGGAGAATT       | -                 |

**Table S2 GO-BP and KEGG analysis results of differentially expressed genes in model group compared with blank group.**

| ID         | Description                          | NES          | p.adjust    | qvalues     |
|------------|--------------------------------------|--------------|-------------|-------------|
| GO:0001837 | epithelial to mesenchymal transition | -1.519249529 | 0.019241347 | 0.012953674 |
| GO:0048762 | mesenchymal cell differentiation     | -1.470766065 | 0.023500184 | 0.015820812 |
| GO:0010257 | NADH dehydrogenase complex assembly  | 1.885553324  | 0.013724482 | 0.009239606 |
| GO:0009060 | aerobic respiration                  | 1.824333874  | 0.014083269 | 0.009481149 |
| GO:0038065 | collagen-activated signaling         | -1.733708223 | 0.009467815 | 0.006373929 |

|            | pathway                                     |              |             |             |  |
|------------|---------------------------------------------|--------------|-------------|-------------|--|
| GO:0030097 | hemopoiesis                                 | -2.340186288 | 0.009467815 | 0.006373929 |  |
| GO:0032905 | transforming growth factor beta1 production | -1.738118032 | 0.016448773 | 0.011073655 |  |
| GO:0045445 | myoblast differentiation                    | -1.762729176 | 0.009467815 | 0.006373929 |  |
| GO:0048659 | smooth muscle cell proliferation            | -1.781186718 | 0.009467815 | 0.006373929 |  |
| GO:0048144 | fibroblast proliferation                    | -1.833216376 | 0.009467815 | 0.006373929 |  |
| mmu04151   | PI3K-Akt signaling pathway                  | -1.54744084  | 0.006770203 | 0.003498478 |  |
| mmu04010   | MAPK signaling pathway                      | -1.667391483 | 0.006770203 | 0.003498478 |  |
| mmu04370   | VEGF signaling pathway                      | -1.694635121 | 0.008911693 | 0.004605085 |  |
| mmu04218   | Cellular senescence                         | -1.707798709 | 0.006770203 | 0.003498478 |  |
| mmu04630   | JAK-STAT signaling pathway                  | -1.945581178 | 0.006770203 | 0.003498478 |  |
| mmu04621   | NOD-like receptor signaling pathway         | -2.308817127 | 0.006770203 | 0.003498478 |  |
| mmu04620   | Toll-like receptor signaling pathway        | -2.376118318 | 0.006770203 | 0.003498478 |  |
| mmu04064   | NF-kappa B signaling pathway                | -2.416432    | 0.006770203 | 0.003498478 |  |
| mmu04640   | Hematopoietic cell lineage                  | -2.541799609 | 0.006770203 | 0.003498478 |  |

Description represents the name of this GO-ID; NES represents the normalized enrichment score; P.adjust represents the P value, which characterizes the confidence of the enrichment results; qvalues represent the q value, which is the P value after correction for multiple hypothesis testing.

**Table S3 GO-BP and KEGG analysis results of differentially expressed genes in lue group compared with model group.**

| ID         | Description                                 | NES         | p.adjust    | qvalues     |
|------------|---------------------------------------------|-------------|-------------|-------------|
| GO:0038065 | collagen-activated signaling pathway        | 1.756224839 | 0.014870134 | 0.009072282 |
| GO:1903706 | regulation of hemopoiesis                   | 2.376743276 | 0.00859736  | 0.005245257 |
| GO:0001837 | epithelial to mesenchymal transition        | 1.876447466 | 0.00859736  | 0.005245257 |
| GO:0048762 | mesenchymal cell differentiation            | 1.996126515 | 0.00859736  | 0.005245257 |
| GO:0007568 | aging                                       | 1.37444252  | 0.053107412 | 0.03240088  |
| GO:0001666 | response to hypoxia                         | 1.313970554 | 0.072676395 | 0.044339934 |
| GO:0070482 | response to oxygen levels                   | 1.266294441 | 0.132029266 | 0.080551175 |
| GO:0032905 | transforming growth factor beta1 production | 1.632523628 | 0.030416142 | 0.018556916 |
| GO:0048144 | fibroblast proliferation                    | 2.106615903 | 0.00859736  | 0.005245257 |
| GO:0045445 | myoblast differentiation                    | 1.938722004 | 0.00859736  | 0.005245257 |
| GO:0048659 | smooth muscle cell proliferation            | 1.770546001 | 0.00859736  | 0.005245257 |
| mmu04640   | Hematopoietic cell lineage                  | 2.506992483 | 0.006840796 | 0.003120363 |
| mmu04064   | NF-kappa B signaling pathway                | 2.369092984 | 0.006840796 | 0.003120363 |
| mmu04620   | Toll-like receptor signaling pathway        | 2.208029091 | 0.006840796 | 0.003120363 |
| mmu04621   | NOD-like receptor signaling pathway         | 2.004542887 | 0.006840796 | 0.003120363 |

|          |                            |             |             |             |
|----------|----------------------------|-------------|-------------|-------------|
| mmu04010 | MAPK signaling pathway     | 1.885521472 | 0.006840796 | 0.003120363 |
| mmu04218 | Cellular senescence        | 1.868056261 | 0.006840796 | 0.003120363 |
| mmu04630 | JAK-STAT signaling pathway | 1.865676493 | 0.008506032 | 0.003879944 |
| mmu04151 | PI3K-Akt signaling pathway | 1.828879397 | 0.006840796 | 0.003120363 |
| mmu04370 | VEGF signaling pathway     | 1.744036596 | 0.012254902 | 0.005589955 |

Description indicates the name of the KEGG pathway; NES represents the normalized enrichment score; P.adjust represents the P value, which characterizes the confidence of the enrichment results; qvalues represent the q value, which is the P value after correction for multiple hypothesis testing.

**Table S4 Molecular Docking Binding Energy of Luteolin and SIRT1.**

| mode | lue-5btr-affinity (kcal/mol) | lue-4i5i-affinity (kcal/mol) |
|------|------------------------------|------------------------------|
| 1    | -7.9                         | -9.6                         |
| 2    | -7.8                         | -9.1                         |
| 3    | -7.7                         | -9                           |
| 4    | -7.6                         | -8.8                         |
| 5    | -7.6                         | -8.1                         |
| 6    | -7.5                         | -7.5                         |
| 7    | -7.5                         | -7.4                         |
| 8    | -7.5                         | -7.3                         |
| 9    | -7.4                         | -7.3                         |
| 10   | -7.4                         | -7.1                         |
| 11   | -7.4                         | -7.1                         |
| 12   | -7.4                         | -7.1                         |
| 13   | -7.4                         | -7                           |
| 14   | -7.3                         | -7                           |
| 15   | -7.3                         | -7                           |
| 16   | -7.3                         | -7                           |
| 17   | -7.2                         | -6.9                         |
| 18   | -7.2                         | -6.9                         |
| 19   | -7.1                         | -6.8                         |
| 20   | -7.1                         | -6.8                         |
